# Supplementary material for: Structural modulation of insulin by hydrophobic and hydrophilic molecules
Source: Royal Society of Chemistry journal article supplement (doi:10.1039/d3ra06647a), 2023-01-01
Supplement: d3ra06647a1.pdf [file d3ra06647a1.pdf]

## Electronic Supplementary Information

### **Structural modulation of insulin by hydrophobic and hydrophilic molecules**

Shahnaz Begum<sup>a</sup>, Hasan Pervej<sup>a</sup>, Ramakrishna Dolui<sup>a</sup>, Swarnali Paul<sup>a</sup>, Sanhita Maity<sup>a</sup>, Nayim Sepay<sup>b</sup>, Mohd Afzal<sup>c</sup>, Umesh Chandra Halder<sup>a</sup>

<sup>a</sup>Department of Chemistry, Jadavpur University, Kolkata-700032, India.

<sup>b</sup>Department of Chemistry, Lady Brabourne College, Kolkata-700017, India

<sup>c</sup>Department of Chemistry, College of Science, King Saud University, Riyadh 11451, Saudi Arabia

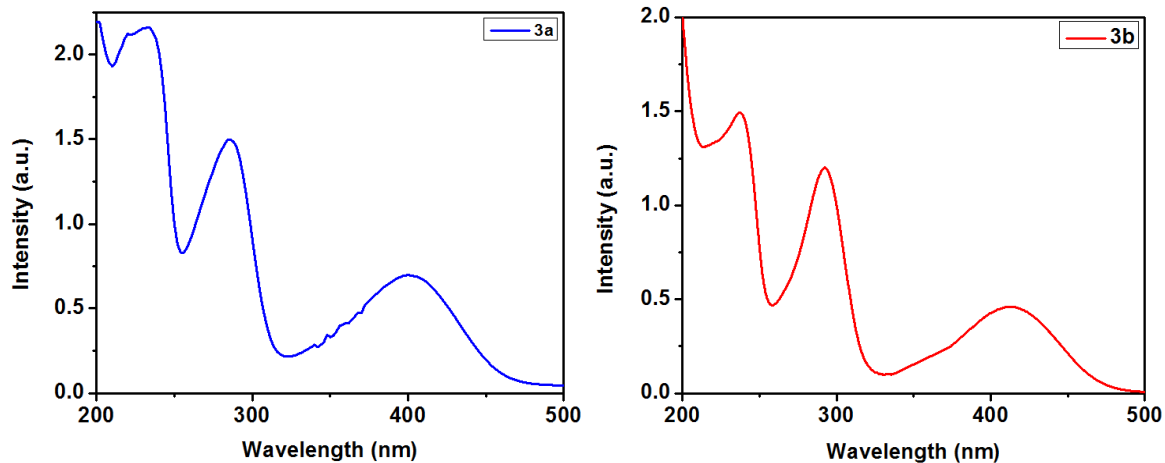

Figure S1: UV-vis spectroscopy of **3a** and **3b**

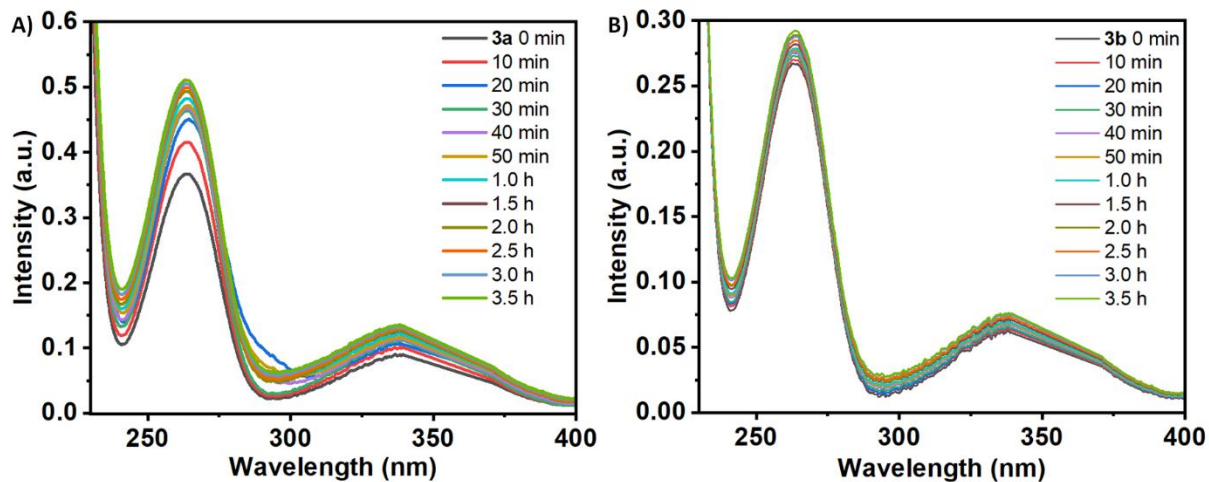

Figure S2: UV-vis spectroscopy of (A) **3a** and (B) **3b** with time.

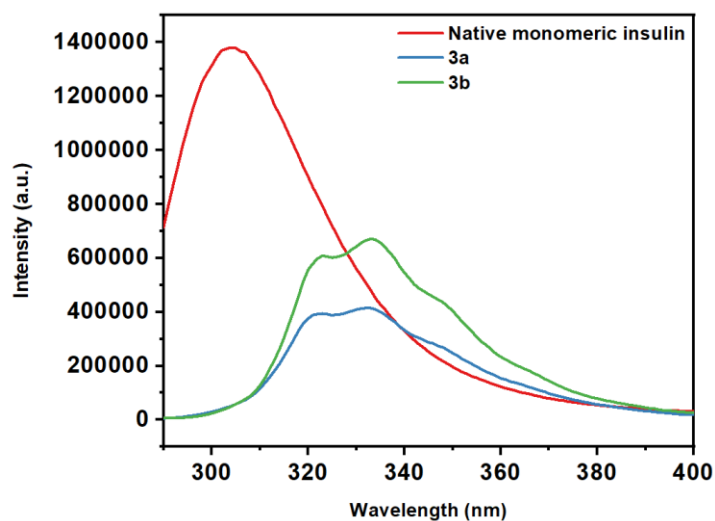

Figure S3: Fluorescence spectra of insulin and synthesized compounds **3a** and **3b** on excitation 276 nm.

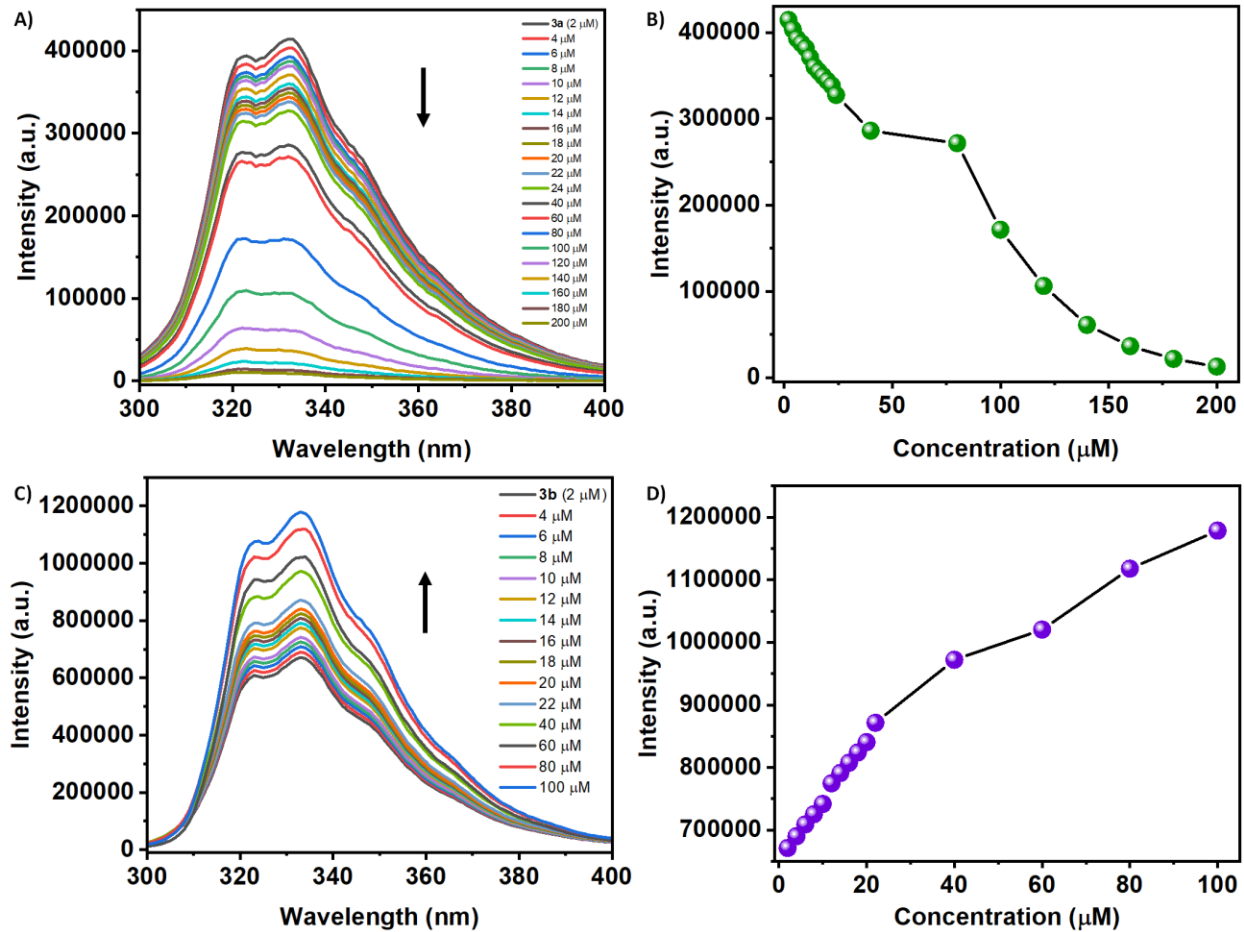

Figure S4: (A) Change of fluorescence of **3a** with increasing concentration, (B) Fluorescence intensity vs concentration plot of **3a**, (C) Change of fluorescence of **3b** with increasing concentration, (D) Fluorescence intensity vs concentration plot of **3b**.

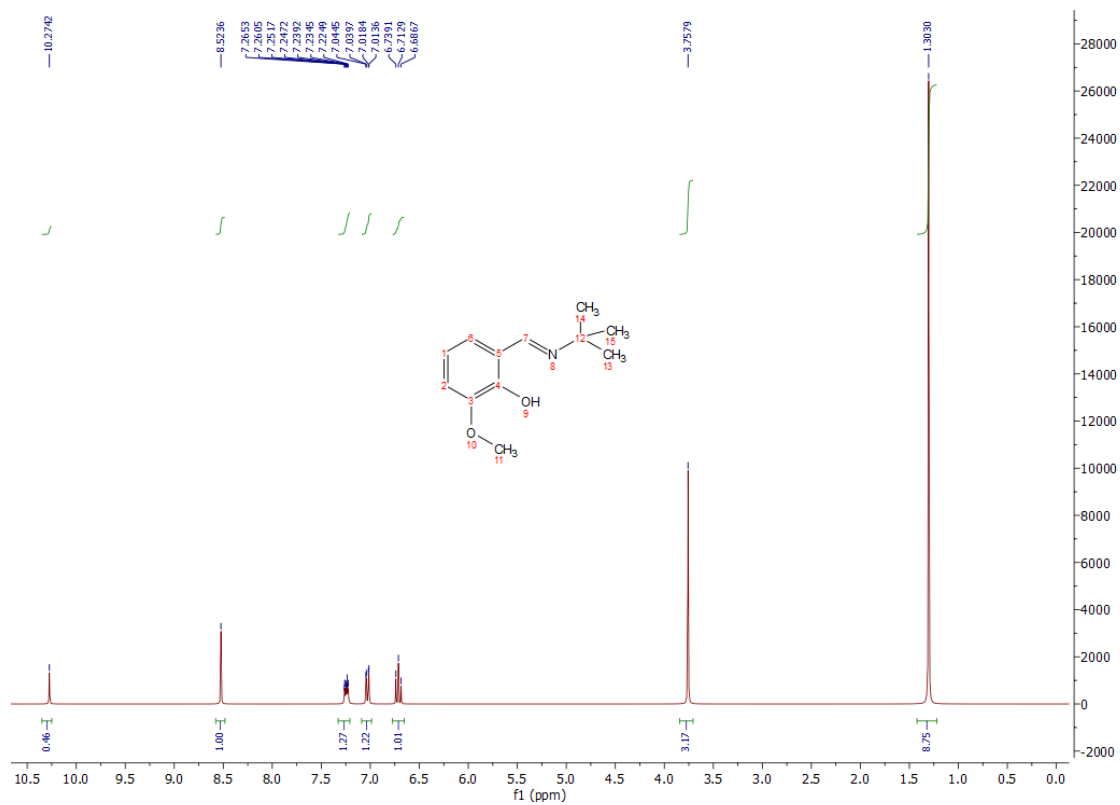

Figure S5. The <sup>1</sup>H NMR spectra of **3a**.

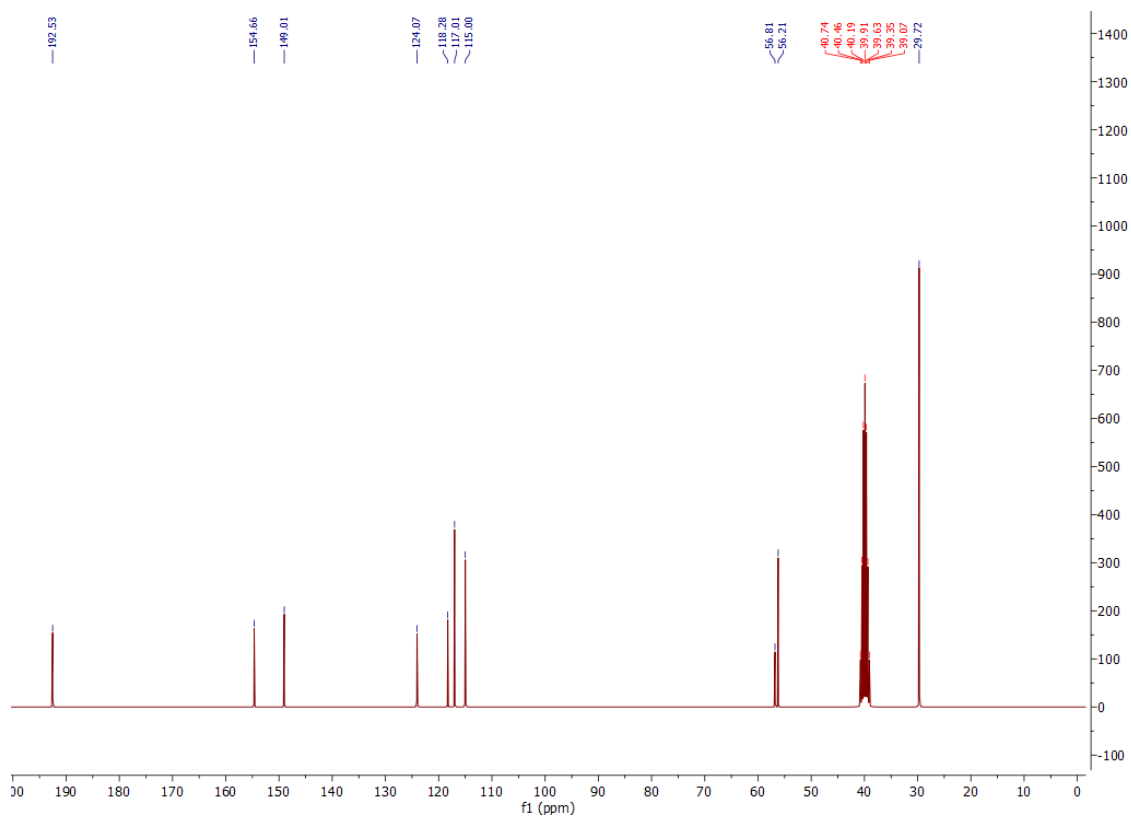

Figure S6. The <sup>13</sup>C NMR spectra of **3a**.

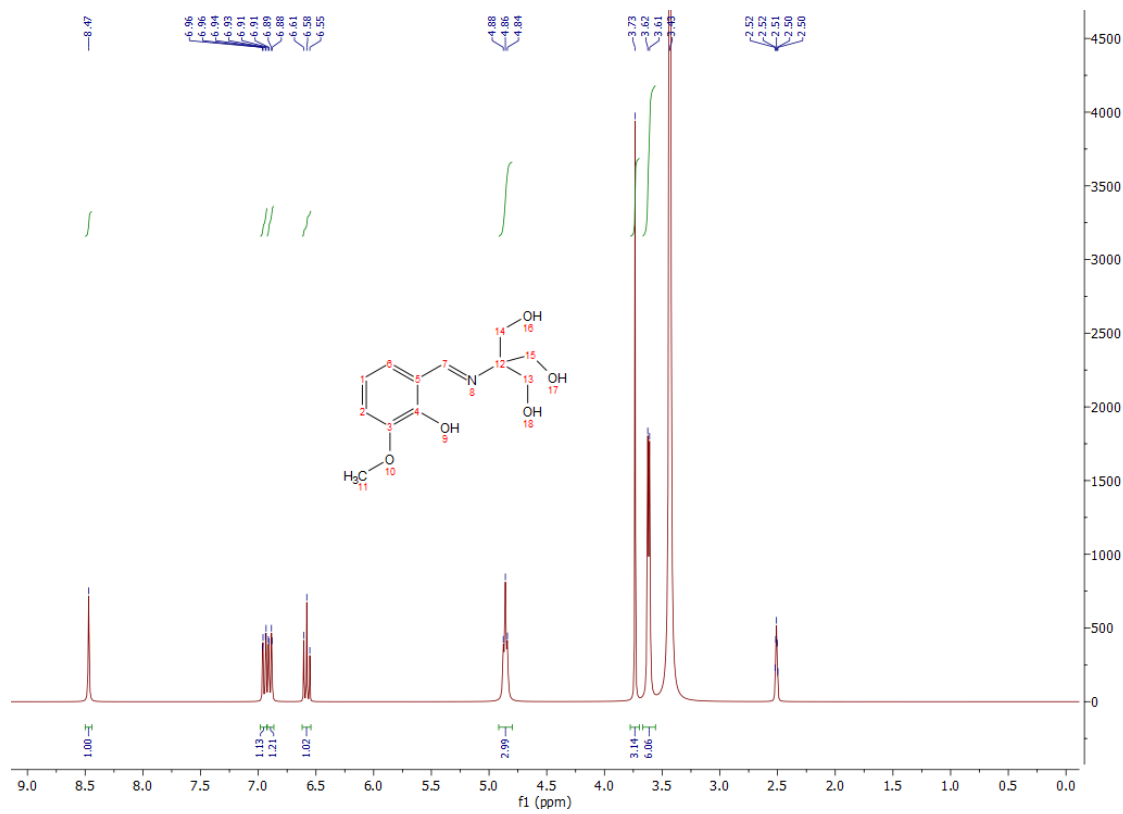

Figure S7. The <sup>1</sup>H NMR spectra of **3b**.

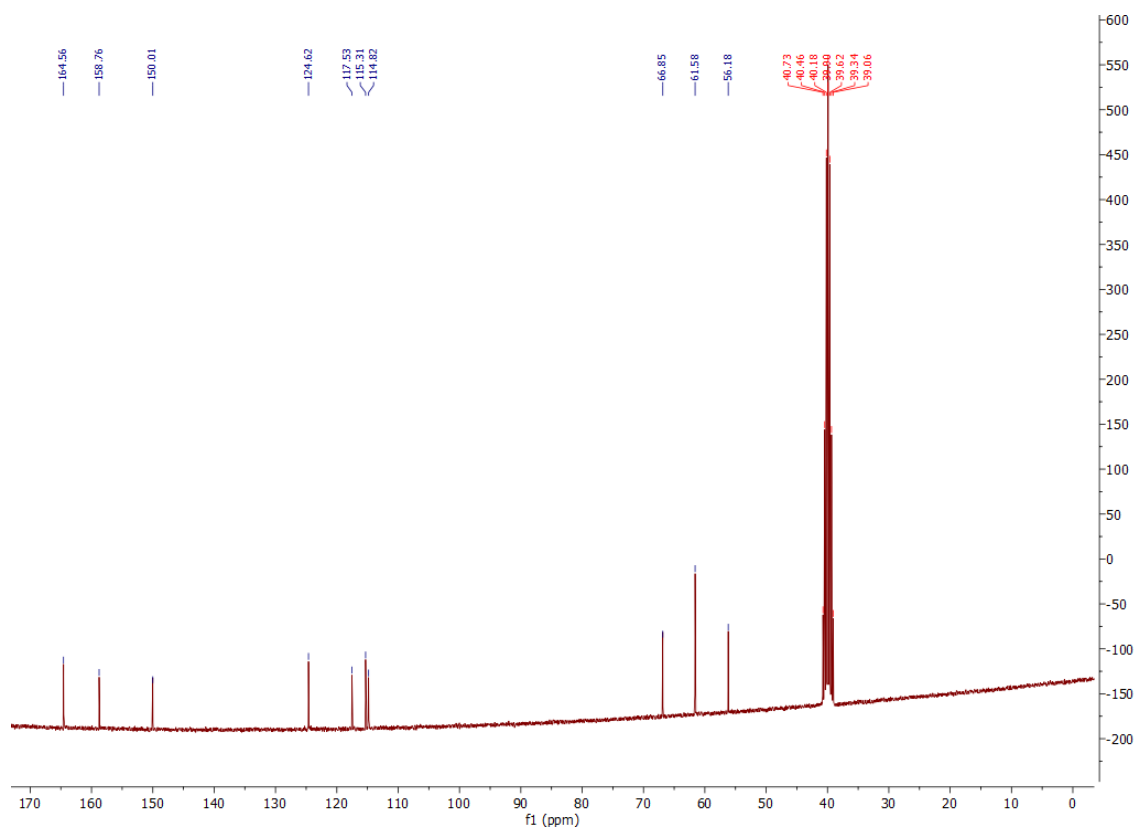

Figure S8. The <sup>13</sup>C NMR spectra of **3b**.

**Table S1: Structural integrity of monomeric insulin in the absence and presence of the Schiff bases 3a and 3b determined by CD calculations.<sup>a</sup>**

| <b>Samples</b>                  | <b>% of <math>\alpha</math> helix</b> | <b>% of <math>\beta</math> sheet</b> | <b>% of Random Coil</b> |
|---------------------------------|---------------------------------------|--------------------------------------|-------------------------|
| Insulin (6 $\mu$ M)             | 89.93                                 | 0.68                                 | 1.45                    |
| Insulin + <b>3a</b> (1 $\mu$ M) | 87.18                                 | 1.20                                 | 2.50                    |
| Insulin + <b>3a</b> (2 $\mu$ M) | 83.19                                 | 0.38                                 | 2.671                   |
| Insulin + <b>3a</b> (6 $\mu$ M) | 79.34                                 | 0.97                                 | 3.934                   |
| Insulin + <b>3b</b> (1 $\mu$ M) | 93.28                                 | 0.29                                 | 1.25                    |
| Insulin + <b>3b</b> (2 $\mu$ M) | 92.67                                 | 0.28                                 | 1.96                    |
| Insulin + <b>3b</b> (6 $\mu$ M) | 81.93                                 | 2.07                                 | 5.23                    |

<sup>a</sup> : Calculated by CDNN 2.1 Software
